# Supplementary material for: Chemical Characterization of Sambucus nigra L. Flowers Aqueous Extract and Its Biological Implications
Source: MDPI journal article supplement (doi:10.3390/biom11081222), 2021-08-17
Supplement: s1 [file s1]

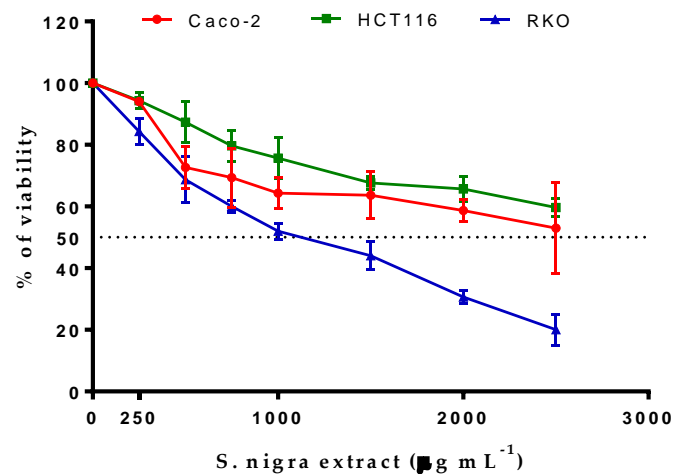

**Figure S1.** Cellular viability (%) estimated by MTT assay of *S. nigra* flower aqueous extract against human colon carcinoma (RKO), human colorectal carcinoma (HCT116), human colorectal carcinoma (Caco-2) cells. Data are expressed as mean  $\pm$  S.D. (n=3)
